# Supplementary material
Source: PubMed Central journal article supplement (PMC6416917)
Supplement: JB.00614-18-s0001.pdf [file JB.00614-18-s0001.pdf]

1 **The respiratory selenite reductase from *Bacillus selenitireducens* strain MLS10**

2

3 **Michael Wells<sup>1</sup>, Jennifer McGarry<sup>2</sup>, Maissa M. Gaye<sup>2</sup>, Partha Basu<sup>2</sup>, Ronald S. Oremland<sup>3</sup>,**

4 **and John F. Stolz<sup>1\*</sup>**

5

6

7 **SUPPLEMENTAL MATERIALS**

8

9 **Figure S1**

10  
11  
12  
13  
14  
15  
16  
17  
18  
19  
20  
21  
22  
23  
24  
25  
26  
27  
28  
29  
30  
31  
32  
33  
34  
35  
36  
37  
38  
39  
40  
41  
42  
43  
44  
45  
46  
47  
48  
49  
50

**A) Bsel\_1475 Rhodanese domain protein**

MKHKWTGLLMGAALLTATACSSDEASVLADEENDNEEQAAVETNVFN<sup>D</sup>LMANSAAY  
MEDPNFNVITGEALHNKTVFENP<sup>E</sup>EDYFILDVRD<sup>T</sup>TTFVSGHIPGAVNVPYRV<sup>S</sup>GLEQMY  
LELPEDKTIYV<sup>V</sup>CFSGHTASHTVGMLNALGYDAEALQFGMGGYASGTDLGSN<sup>I</sup>PGGPA  
ELPVVTTGFELTETHDLPEIMSD<sup>E</sup>S<sup>D</sup>IR<sup>T</sup>IAHEQSQNFLDQEP<sup>P</sup>GV<sup>M</sup>GAPDLNEMINEGN  
LDGHQLIDIRLGEHYEQGHIEGAANLPYNELFNEENLSLLDPEKMTVVIGYNGYDASQV  
TRLLGQLEYS<sup>A</sup>VPLAYGMSIWSGDES<sup>V</sup>VGE<sup>H</sup>MFDFSNVYSLPVRELKFDMDAGDIEAG  
CR

**B) Bsel\_1476 Trimethylamine-N-oxide reductase**

MPKLR<sup>R</sup>SFLKASALTA<sup>A</sup>AAAVPFKMTMGDFREASAEAE<sup>E</sup>KVIPST<sup>C</sup>NG<sup>C</sup>ASM<sup>C</sup>GIYA  
HVKNDR<sup>L</sup>WYVEGHPVHLKAGGRL<sup>C</sup>ARGHGMAADIY<sup>G</sup>KGRVQGP<sup>M</sup>KKVAE<sup>E</sup>GEFEPIS  
WEQAFKEIG<sup>E</sup>KMG<sup>N</sup>LRDQYGGNSFLWLEHGVRGKRYADPL<sup>L</sup>DRMGSSNYITHYST<sup>R</sup>FT  
SKTNAWQH<sup>M</sup>VGSM<sup>P</sup>PAGDHENAKYMIFEG<sup>R</sup>NFAGAI<sup>P</sup>NGMKKILKAKDNGAKIVVIDP  
RYSEIAKVADEWIP<sup>R</sup>PGTDLALRLGMAHTLISE<sup>N</sup>LYDSAFVKKYV<sup>T</sup>DFDEFWSLNKDK  
DADWAAEITGIDADTIRRVAREFAEHAPEAFMEPGWHGLHCHYFNSTQTAQMGIILNAL  
VGNFFKRGGLMPSANVEFGEYMHTDVEAVEKGP<sup>R</sup>ADGAGVEGEHMTVEPGRGIAQNV  
PDMIDKGR<sup>I</sup>KSVFIYHFNPLRTAPDPEYQKKIANAELVVSIPVDWNETSVYAADYILPEN  
YYL<sup>R</sup>TEVPQAVSGHISHDWPQISIRQ<sup>V</sup>T<sup>D</sup>PLHDTLPLLDIMRGITKEMGYDNLYDFTV  
DDEIAAMLEPTGVTPEELKEKGTVELRTNKVEPKFPVNL<sup>S</sup>GEPNLGTFSGKIQFSAEIFKI  
DGKRGVPTWIPTMVQPD<sup>L</sup>NNPEEFRLIHGKQPYHSHSVTSTNASLLRITEKYNGEAMWI  
NTKRAKDLGIEDGDTVSVKSSIANKTVPVHV<sup>T</sup>QLIHPECVWIPSA<sup>Y</sup>GAFSNKIKEGYQLG  
INFND<sup>F</sup>IPMMIEPYSGSTMSQEVVVNVQKGGEA

**C) Bsel\_1477 4Fe-4S ferredoxin iron-sulfur binding domain protein**

MANYGLLIDTRK<sup>R</sup>TG<sup>R</sup>HA<sup>R</sup>SIA<sup>R</sup>STYNELEPEVSYNRLEFIESGTYPNVKMDIVPVQ<sup>C</sup>M  
HCDDAP<sup>C</sup>VKV<sup>C</sup>STQATFKVEENGIVAFNPDK<sup>C</sup>TG<sup>C</sup>KAC<sup>C</sup>MAAC<sup>C</sup>PYDARALNEARLSEK<sup>C</sup>  
RW<sup>C</sup>PEMLTQGKQPS<sup>C</sup>AST<sup>C</sup>MNEVRLFGDLDDPDSEINKKMAQFNTVQLVPEAGTKPRI  
WYIK

**D) Bsel\_1478 Polysulfide reductase NrfD**

MLNRNLWYGITGIMIIFGIIGNIFIHGEHVMGTSNYVPWGS<sup>L</sup>LIGAYVFFVAISTGLTFLS  
SMVHVFKMKQFEFLTKRLTLASIA<sup>T</sup>LLMGFVMIGVELGNPLAMVYILVTPNVMAPIFW  
MGAFYGLYLVLHII<sup>E</sup>FFFQIKDNHKIVNTISPFVLVVGIAAQSTLGA<sup>V</sup>FGLSVARGIWN<sup>S</sup>A  
YLSIFFLIMAFVSGLAVAMIMAFFLSKGNVMKQEDREKLPGLYPFMSKLTMGLLAVGII<sup>F</sup>  
VTWNWIYGLHSGNPNRMASMEMLNGPLAVPYWVLEVG<sup>F</sup>VFLIPLLILGLVKAKKAAT  
MLTTGVVLLIGLFAMRIILTFAGQMVPLEVVTGSLTMNELRDVSILWSEWATMIFGVGG  
SILYMLGERFLNLDVTEHGS<sup>H</sup>GTHDKKATQAS

51 **E) Bsel\_1479 Chaperon protein NarJ**

52 MNKTDREKETYTELIRLLGELYKFPDDEVEQAIAEGVLDQEIDDYLSLFPEIRIENKQSFSS  
53 LRDKELTAKKQYMTAYSGITTPFHPPVESLYKPWSVDPKDQTGLYNKTGYMGMGDAAL  
54 HMKHLLQHYEIEVPKDYEMMPDHLAISLEFYAMLLERDTEAAEAFHQDHFDFWLKAFH  
55 KKHQEIDDVPFYDYLLRVLIAVTAVSPRELT  
56

57 **F) Bsel\_1480 Rhodanese domain protein**

58 MKKWAIGLLSLAGMITLSACGTSQASETEPTSFLPMEPDVSPYIVVEEEAEEEGQDHVPYH  
59 ENWNYIDTVQLTRLMDGLPEISQDRESYDQVPP**EWGDVALIDSRPPGVYAAGHINGAINI**  
60 **PDSEFDDYKHLLPEDKDTQLIFYCGGLHCALSGNSSEKAMDMGYENSYVYQEGTPAWK**  
61 **SAGNYFTVTPEYVEEQILES NVARD**DTDPVMIIDTRTYAGYFAEHIPTAVFWDDTQYGT  
62 **KYQGFAPENKDAEIIYCGGFFCHKSPALADDLLGDGYTNVKVLSGGMPAWKQAGLPT**  
63 **FGMETADADFDVSAGKVDRSVSAEDFEDLIASGATVVDVRGDGEVANGMIDGALH**  
64 **VPDGDIIHANDPSVEETLPDDKSTLLIHCASGARASGVVEKIADLGYEEVYYWNGGISIS**  
65 **DDGSYTLN**  
66  
67

68 **Figure S1. Structural motifs predicted in proteins of the MLS10 Srr operon *srrEABCF***  
69 **(Bsel 1475 – Bsel\_1480).** The annotation is that provided by the Joint Genome Institute  
70 Integrated Genome who sequenced the genome. A) SrrE, Rhodanese domain protein. The  
71 putative lipoprotein motif anchoring the protein to the membrane is highlighted in grey. The  
72 putative rhodanese domains are highlighted in purple. One rhodanese domain has a predicted  
73 catalytically active cysteine residue, highlighted in teal. B) SrrA, Trimethylamine-N-oxide  
74 reductase. The putative twin arginine translocation motif is highlighted in teal. The putative  
75 4Fe-4S cluster is highlighted in yellow. The cysteine residue predicted to coordinate the guanine  
76 dinucleotide molybdopterin cofactor is highlighted in red. C) SrrB, 4Fe-4S ferredoxin iron-sulfur  
77 binding domain protein. The four predicted 4Fe-4S iron clusters are highlighted. The first 4Fe-  
78 4S cluster is highlighted in red. The second 4Fe-4S cluster is highlighted in purple. The third  
79 4Fe-4S cluster is highlighted in teal. The fourth 4Fe-4S cluster is highlighted in yellow.  
80 D) SrrC, Polysulfide reductase NrfD. E) SrrD, Chaperon protein NarJ. F). SrrF, Rhodanese  
81 domain protein. The putative lipoprotein motif anchoring the protein to the membrane is  
82 highlighted in grey. The putative rhodanese domains are highlighted in purple. All three  
83 rhodanese domains have predicted catalytically active cysteine residues, highlighted in teal.
